# Supplementary material
Source: PubMed Central journal article supplement (PMC6743061)
Supplement: jamafacialplastsurg-21-480-s002.pdf [file jamafacialplastsurg-21-480-s002.pdf]

## Supplementary Online Content

Govas P, Kazi R, Slaugenhaupt RM, Carroll BT. Effect of a vibratory anesthetic device on pain anticipation and subsequent pain perception among patients undergoing cutaneous cancer removal surgery: a randomized clinical trial. *JAMA Facial Plast Surg*. Published online September 12, 2019.  
doi:10.1001/jamafacial.2019.0733

### **eTable.** ANOVA and Multivariate Regression Analysis

This supplementary material has been provided by the authors to give readers additional information about their work.

**eTable.** ANOVA and Multivariate Regression Analysis

|                      | <i>df</i>                | <b>SS</b> | <b>MS</b>          | <b>F Statistic</b> | <b>P Value</b>   |
|----------------------|--------------------------|-----------|--------------------|--------------------|------------------|
| Regression           | 4                        | 29.818    | 7.455              | 2.741              | .03 <sup>a</sup> |
| Residual             | 96                       | 261.053   | 2.719              |                    |                  |
| Total                | 100                      | 290.871   |                    |                    |                  |
|                      | <b>Coefficients (SE)</b> |           | <b>t Statistic</b> | <b>P Value</b>     | <b>95% CI</b>    |
| Intercept            | 1.63364                  | 1.096     | 1.490              | .14                | −0.542 to 3.809  |
| Age                  | 0.00711                  | 0.016     | 0.456              | .65                | −0.024 to 0.038  |
| Sex (male or female) | −0.44844                 | 0.352     | −1.275             | .21                | −1.147 to 0.250  |
| VAD on or off        | −0.75584                 | 0.332     | −2.277             | .03 <sup>a</sup>   | −1.415 to −0.097 |
| aNRS (≤4 or >4)      | −0.61561                 | 0.366     | 1.683              | .10                | −0.110 to 1.342  |

Abbreviations: aNRS, anticipated Numeric Rating Scale; *df*, degrees of freedom; MS, mean square; VAD, vibratory anesthetic device; SE, standard error; SS, sum of squares.

<sup>a</sup>Statistical significance.
